# Supplementary material for: Neurosteroids: Structure-Uptake Relationships and Computational Modeling of Organic Anion Transporting Polypeptides (OATP)1A2
Source: Molecules. 2021 Sep 17;26(18):5662. doi: 10.3390/molecules26185662 (PMC8472597; doi:10.3390/molecules26185662)
Supplement: Supplementary file 1 [file molecules-26-05662-s001.zip › Adla_et_al_Neurosteroids_Supporting info_V2.pdf]

## Supporting information

### **Neurosteroids: Structure-Uptake Relationships and Computational Modeling of Organic Anion Transporting Polypeptides (OATP)1A2**

Santosh Kumar Adla <sup>1,2,\*†</sup>, Arun Kumar Tonduru <sup>1,†</sup>, Thales Kronenberger <sup>1,3</sup>, Eva Kudova <sup>2</sup>, Antti Poso <sup>1,3</sup> and Kristiina M. Huttunen <sup>1</sup>

<sup>1</sup> School of Pharmacy, Faculty of Health Sciences, University of Eastern Finland, P.O. Box 1627, FI-70211 Kuopio, Finland; arun.tonduru@uef.fi (A.K.T.); kronenberger7@gmail.com (T.K.); antti.poso@uef.fi (A.P.); kristiina.huttunen@uef.fi (K.M.H.)

<sup>2</sup> Institute of Organic Chemistry and Biochemistry (IOCB), Czech Academy of Sciences, Flemingovo Namesti 542/2, 160 00 Prague, Czech Republic; eva.kudova@uochb.cas.cz

<sup>3</sup> Department of Medical Oncology and Pneumology, Internal Medicine VIII, University Hospital of Tübingen, Otfried-Müller-Strasse 14, 72076 Tübingen, Germany

\* Correspondence: santosh.adla@uef.fi

† These authors contributed equally to this work.

#### List of Figures:

|                  |                                                                                                                                               |
|------------------|-----------------------------------------------------------------------------------------------------------------------------------------------|
| <b>Figure S1</b> | Alignment between OATP1A2 and template structure galactonate symporter PDB ID: 6E9N                                                           |
| <b>Figure S2</b> | Alignment between OATP1A2 and template structure pancreatic secretory inhibitor kazal type PDB ID: 1TGS for the 5th extracellular loop region |
| <b>Figure S3</b> | Conserved residues and polymorphic studies                                                                                                    |
| <b>Figure S4</b> | Stable binding mode of compound 2-5                                                                                                           |
| <b>Figure S5</b> | Residues having hydrogen bond interactions and water interactions                                                                             |
| <b>Figure S6</b> | Root Mean Squared Deviation (RMSD) of protein and E3S, compounds 1 - 3                                                                        |
| <b>Figure S7</b> | Root Mean Squared Deviation (RMSD) of protein and compounds 4 - 7                                                                             |
| <b>Figure S8</b> | Root Mean Squared Deviation (RMSD) of protein and compounds 8 – 11                                                                            |
| <b>Figure S9</b> | Principal Component Analysis (PCA) of OATP1A2-ligand bound complexes                                                                          |

#### List of Table:

|                 |                                                                                                                                                                                                                                                                                |
|-----------------|--------------------------------------------------------------------------------------------------------------------------------------------------------------------------------------------------------------------------------------------------------------------------------|
| <b>Table S1</b> | Prediction of the potential binding sites in the OATP1A2 and its druggability as depicted by the Drug and Site scores (where >0.8 is suggested to be druggable) as well as metrics: exposure to the solvent, pocket volume and ratio between hydrogen bond acceptors and donor |
|-----------------|--------------------------------------------------------------------------------------------------------------------------------------------------------------------------------------------------------------------------------------------------------------------------------|

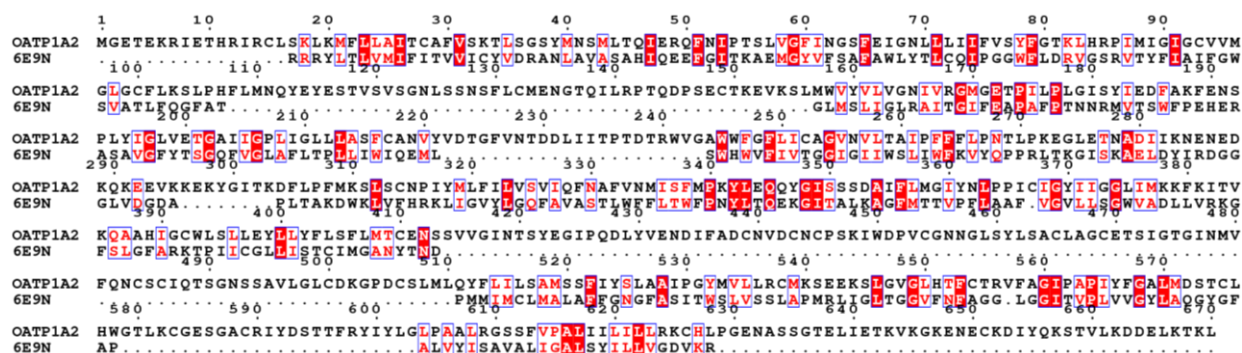

**Figure S1.** Alignment between OATP1A2 and template structure galactonate symporter PDB ID: 6E9N

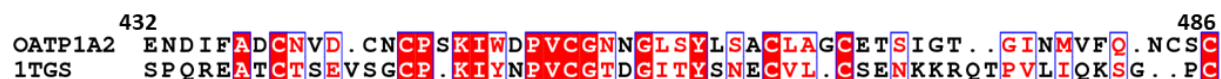

**Figure S2.** Alignment between OATP1A2 and template structure pancreatic secretory inhibitor kazal type PDB ID: 1TGS for the 5th extracellular loop region

| Site   | SiteScore | Dscore | Volume (Å) | exposure | hydrophobic | Hydrophilic | Don/acc |
|--------|-----------|--------|------------|----------|-------------|-------------|---------|
| Site 1 | 1.18      | 1.22   | 97.06      | 0.28     | 4.50        | 0.45        | 4.82    |
| Site 2 | 1.11      | 1.16   | 1264.64    | 0.53     | 1.47        | 0.75        | 0.87    |
| Site 3 | 0.98      | 0.96   | 590.30     | 0.64     | 0.22        | 1.16        | 0.93    |
| Site 4 | 0.97      | 0.92   | 381.41     | 0.57     | 0.17        | 1.25        | 1.05    |
| Site 5 | 0.77      | 0.74   | 185.90     | 0.68     | 0.18        | 1.06        | 1.04    |

**Table S1.** Prediction of the potential binding sites in the OATP1A2 and its druggability as depicted by the Drug and Site scores (where >0.8 is suggested to be druggable) as well as metrics: exposure to the solvent, pocket volume and ratio between hydrogen bond acceptors and donor

|         |              |              |             |             |             |
|---------|--------------|--------------|-------------|-------------|-------------|
| A)      |              |              |             |             | 33          |
| OATP1A2 | -----ET--    | ---HRIR--C   | ----LSKLKM  | FLLAITCAFV  | SKTL-SGSYM  |
| OATP1B1 | -----EN--    | ---KKTR--Y   | ----CNGLKM  | FLAALSLSFI  | AKTL-GAIIM  |
| OATP1B3 | -----EK--    | ---KKTR--R   | ----CNGFKM  | FLAALSFSYI  | AKAL-GGIIM  |
| OATP1C1 | -----SE--    | ---EKQP--C   | ----CGELKV  | FLCALS FVYF | AKAL-AEGYL  |
| OATP3A1 | -----KK--    | ---KKKKVSC   | ----FSNIKI  | FLVSECALML  | AQGT-VGAYL  |
| OATP2A1 | -----SRAG    | ---RCAR-SV   | ----FGNIKV  | FVLCQGLLQL  | CQLL-YSAYF  |
| OATP2B1 | -----GKAS    | PDPQDVRPSV   | ----FHNIKL  | FVLCHSLLQL  | AQLM-ISGYL  |
| OATP4A1 | -VSAGQSVAC   | GWWAFAP-PC   | LQ-VLNTPKG  | ILFFLCAAAF  | LQGMTVNGFI  |
| OATP5A1 | DLSKTFSVSS   | ALAMLQERRC   | LYVVLTD SRC | FLVCMCFLTF  | IQALMVSGYL  |
| OATP4C1 | E-----EGSY   | GWRNFHP-QC   | LQ-RCNTPGG  | FLLHYCLLAV  | TQGIVVNGLV  |
| OATP6A1 | EVDDSLEQPC   | GLGCLVS-TC   | CE-CCNNIRC  | FMIFYCILLI  | CQGVVF-GLI  |
| B)      |              |              |             |             | 556         |
| OATP1A2 | FIYSLAAIPG   | YMVLLRCMK S  | EEKSLGVGLH  | TFCTRVFAGI  | PAPIYFGALM  |
| OATP1B1 | FFSALGGTSH   | VMLIVKIVQP   | ELKSLALGFH  | SMVIRALGGI  | LAPIYFGALI  |
| OATP1B3 | LFSATGGTTF   | ILLTVKIVQP   | ELKALAMGFQ  | SMVIRTLGGI  | LAPIYFGALI  |
| OATP1C1 | YTL SLGGIPG  | YILLRCIKP    | QLKS FALGIY | TLAIRVLAGI  | PAPVYFGVLI  |
| OATP3A1 | LIGAMAQTPS   | VIIILIRT VSP | ELKS YALGVL | FLLLRLLGFI  | PPPLIFGAGI  |
| OATP2A1 | LIACISHNPL   | YMMVLRV V NQ | EEKSFAIGVQ  | FLLMRL LAWL | PSPALYGLTI  |
| OATP2B1 | ALACLTHTPS   | FMLILRGVKK   | EDKTLAVGIQ  | FMFLRILAWM  | PSPVIHGS AI |
| OATP4A1 | FFTF LSSIP A | LTATLR CVRD  | PQRS FALGIQ | WIVVRILGGI  | PGPIAFGWVI  |
| OATP5A1 | FITACAQPSA   | IIVTLRSVED   | EERPFALGMQ  | FVLLRTLAYI  | PTPIYFGAVI  |
| OATP4C1 | IFTFMAGTPI   | TVSILRCVNH   | RQRSLALGIQ  | FMVLRLLGTI  | PGPIIFGFTI  |
| OATP6A1 | IFS GFSGVPI  | VLAMTRVVPD   | KLRSLALGVS  | YVILRIFGTI  | PGPSIFKMSG  |
| C)      |              |              |             |             | 168 172     |
| OATP1A2 | -ENG TQILRP  | TQD--PSECT   | KEVKSLMWVY  | VLVG-NIVRG  | MGETPILPLG  |
| OATP1B1 | NQI-LSLNRA   | SPEIVGKGCL   | KESGSYMWIY  | VFMG-NMLRG  | IGETPIVPLG  |
| OATP1B3 | NQT-LSFN GT  | SPEIVEKDCV   | KESGSHMWIY  | VFMG-NMLRG  | IGETPIVPLG  |
| OATP1C1 | SQLPVSVMEK   | SKSKISNECE   | VDTSSSMWIY  | VFLG-NLLRG  | IGETPIQPLG  |
| OATP3A1 | NGSGGD-EGP   | DPDLI---CR   | NRTATNMMYL  | LLIGAQVLLG  | IGATPVQPLG  |
| OATP2A1 | -KHWQDLPPS   | KCHSTTQNPQ   | KETS--SMWG  | LMVVAQLLAG  | IGTVPIQPPG  |
| OATP2B1 | -P-TTSAPAS   | APSNGNCSSY   | TETQHLSVVG  | IMFVAQTLLG  | VGGVPIQPPG  |
| OATP4A1 | -----PA      | NPGAVCADST   | SGLSR--YQL  | VFMLGQFLHG  | VGATPLYTLG  |
| OATP5A1 | -----TL      | EPPA-CPKDS   | GGNNHWVYVA  | LFICAQILIG  | MGSTPIYTLG  |
| OATP4C1 | -----TT      | RNSTSCTSST   | SSL-S-NYLY  | VFILGQLLLG  | AGGTPLYTLG  |
| OATP6A1 | -----EI      | KVVS GCQSSG  | ISFQS-KYLS  | FFILGQTVQG  | IAGMPYILG   |

Figure S3. Conserved residues and polymorphic studies: (A) Shows K33 conserved among OATP1 family, (B) Shows R556 conserved among all OATP's, (C) Showing polymorphism studied residues R168 and E172 and conserved among the OATP1 family

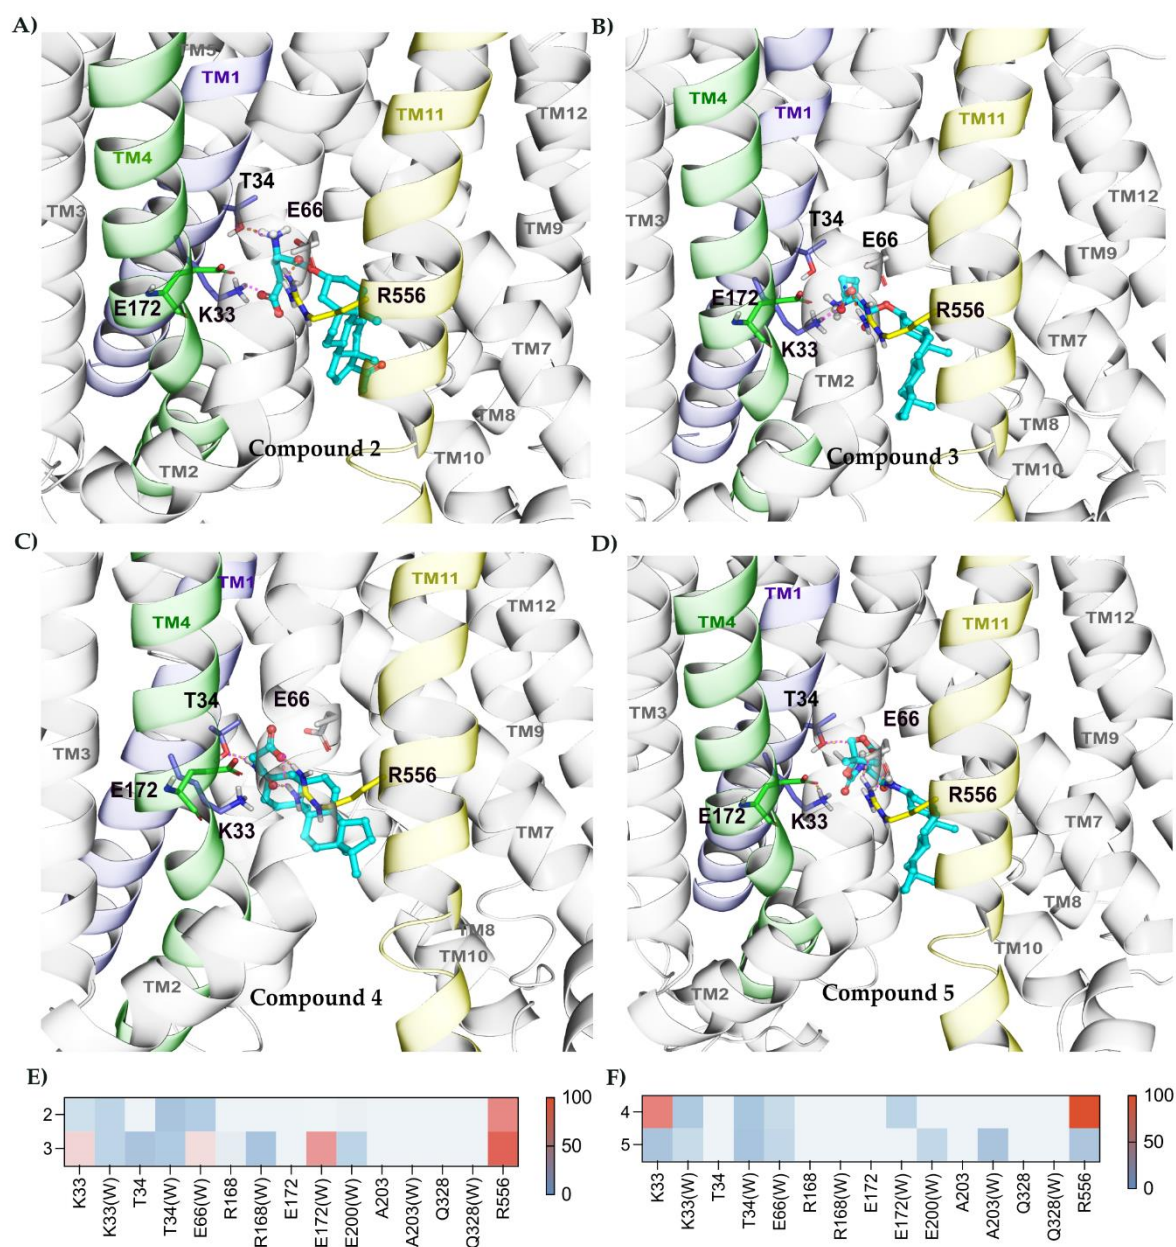

**Figure S4. Stable binding mode of compound 2 – 5 relies on polar contacts with K33 and R556.** (A) Predicted binding pose of compound 3 in OATP1A2, showing interactions with K33, T34 and R556, (B) Predicted binding pose of compound 4 in OATP1A2 showing interactions with K33 and R556, (C) Predicted binding pose of compound 5 in OATP1A2 showing interactions with T34 and R556, (D) Predicted binding pose of compound 6 showing interactions with T34 and R556, (E) and (F) Individual residues and hydrogen bond interactions, water interactions (represented as W), for each compound (E - **compounds 2 and 3**, F - **compounds 4 and 5**) are shown as heatmaps, where each interaction is colored according to the frequency.

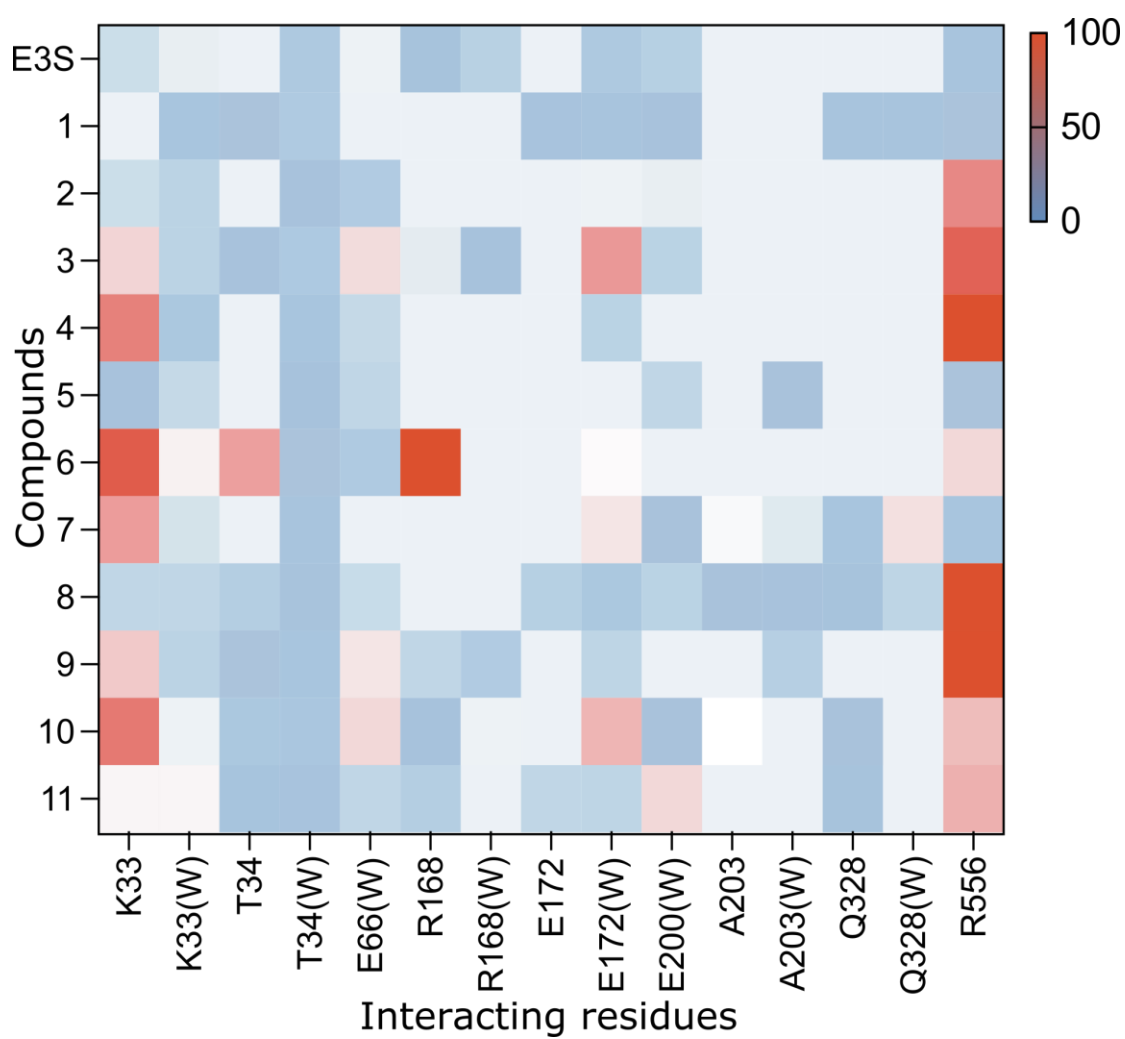

**Figure S5.** Residues having hydrogen bond interactions and water interactions are shown as heatmaps for all compounds where interaction is colored according to the frequency.

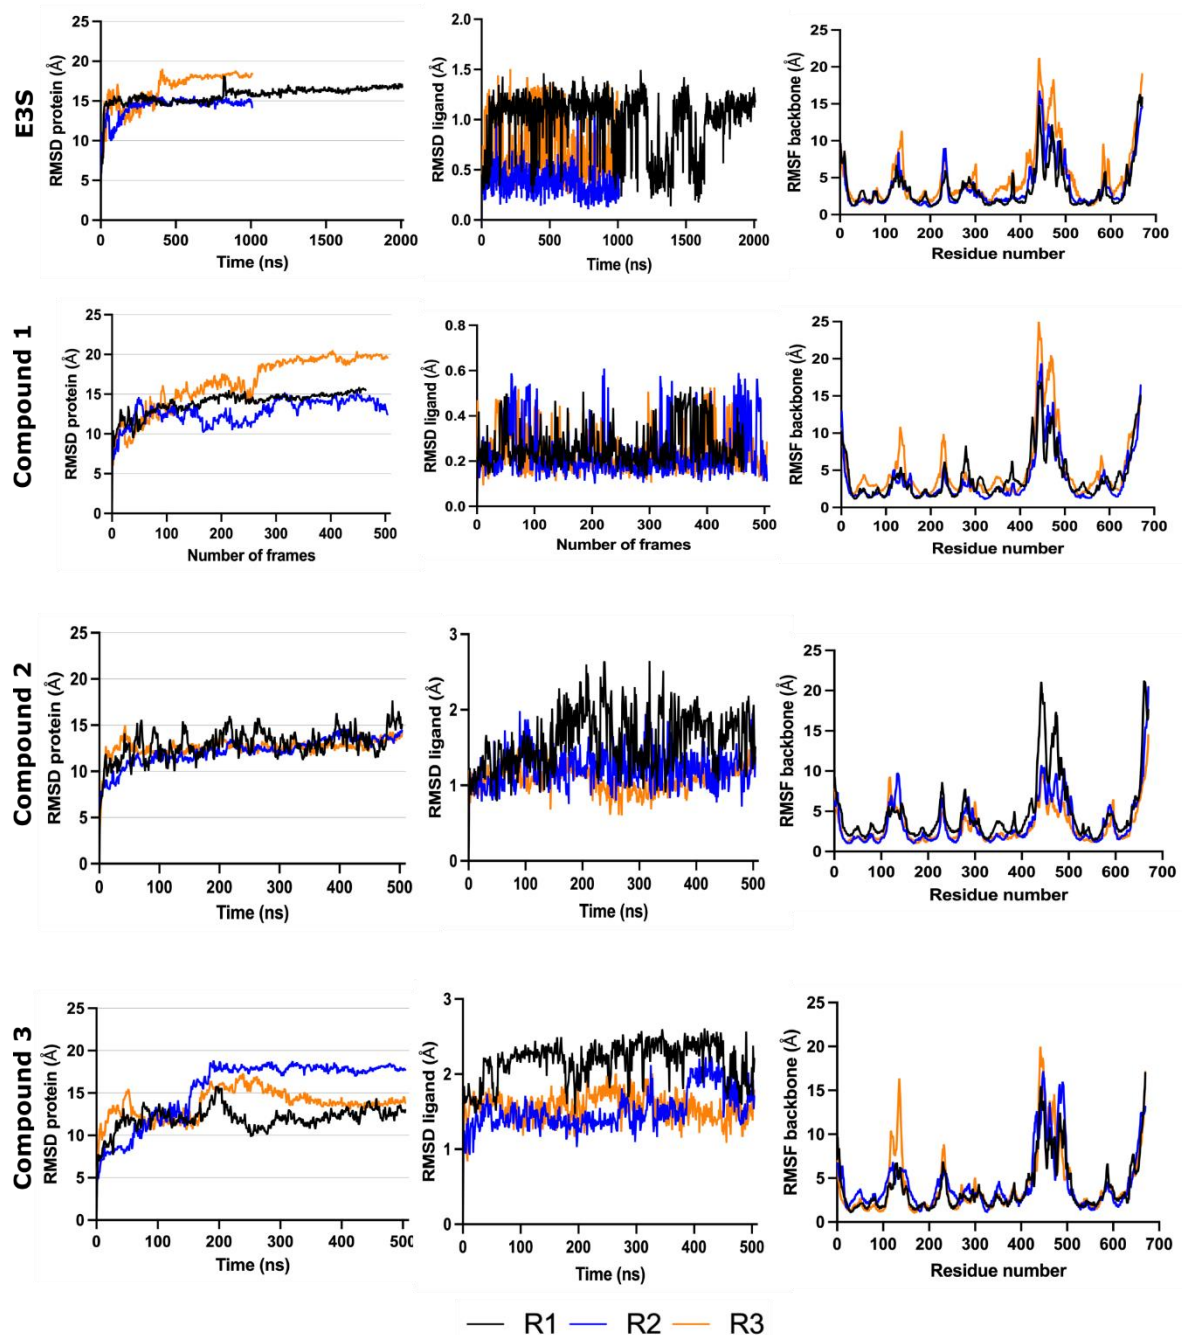

**Figure S6.** Root Mean Squared Deviation (RMSD) of protein along the analyzed simulation calculated in reference to the initial back bone conformation, RMSD of ligand along the analyzed simulation calculated in reference to the initial conformation heavy atoms and RMSF (Root Mean squared fluctuations) of protein along the analyzed simulations in reference to the initial conformation of protein backbone for E3S and compounds 1 – 3. Each replica is represented in different color.

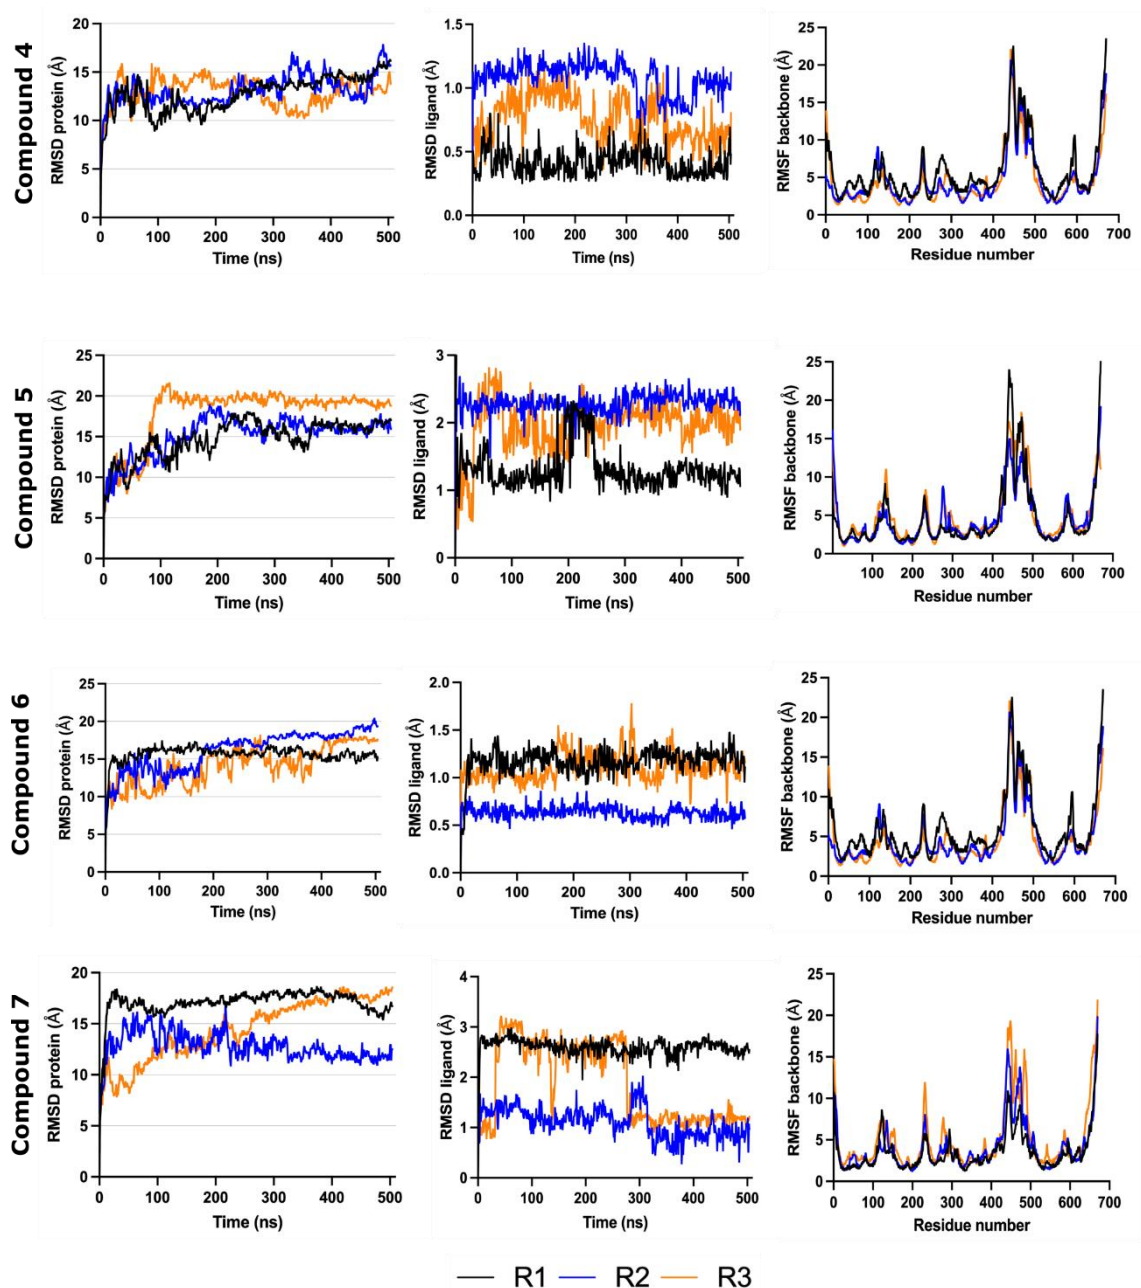

**Figure S7.** Root Mean Squared Deviation (RMSD) of protein along the analyzed simulation calculated in reference to the initial back bone conformation, RMSD of ligand along the analyzed simulation calculated in reference to the initial conformation heavy atoms and RMSF (Root Mean squared fluctuations) of protein along the analyzed simulations in reference to the initial conformation of protein backbone for **compounds 4-7**. Each replica is represented in different color.

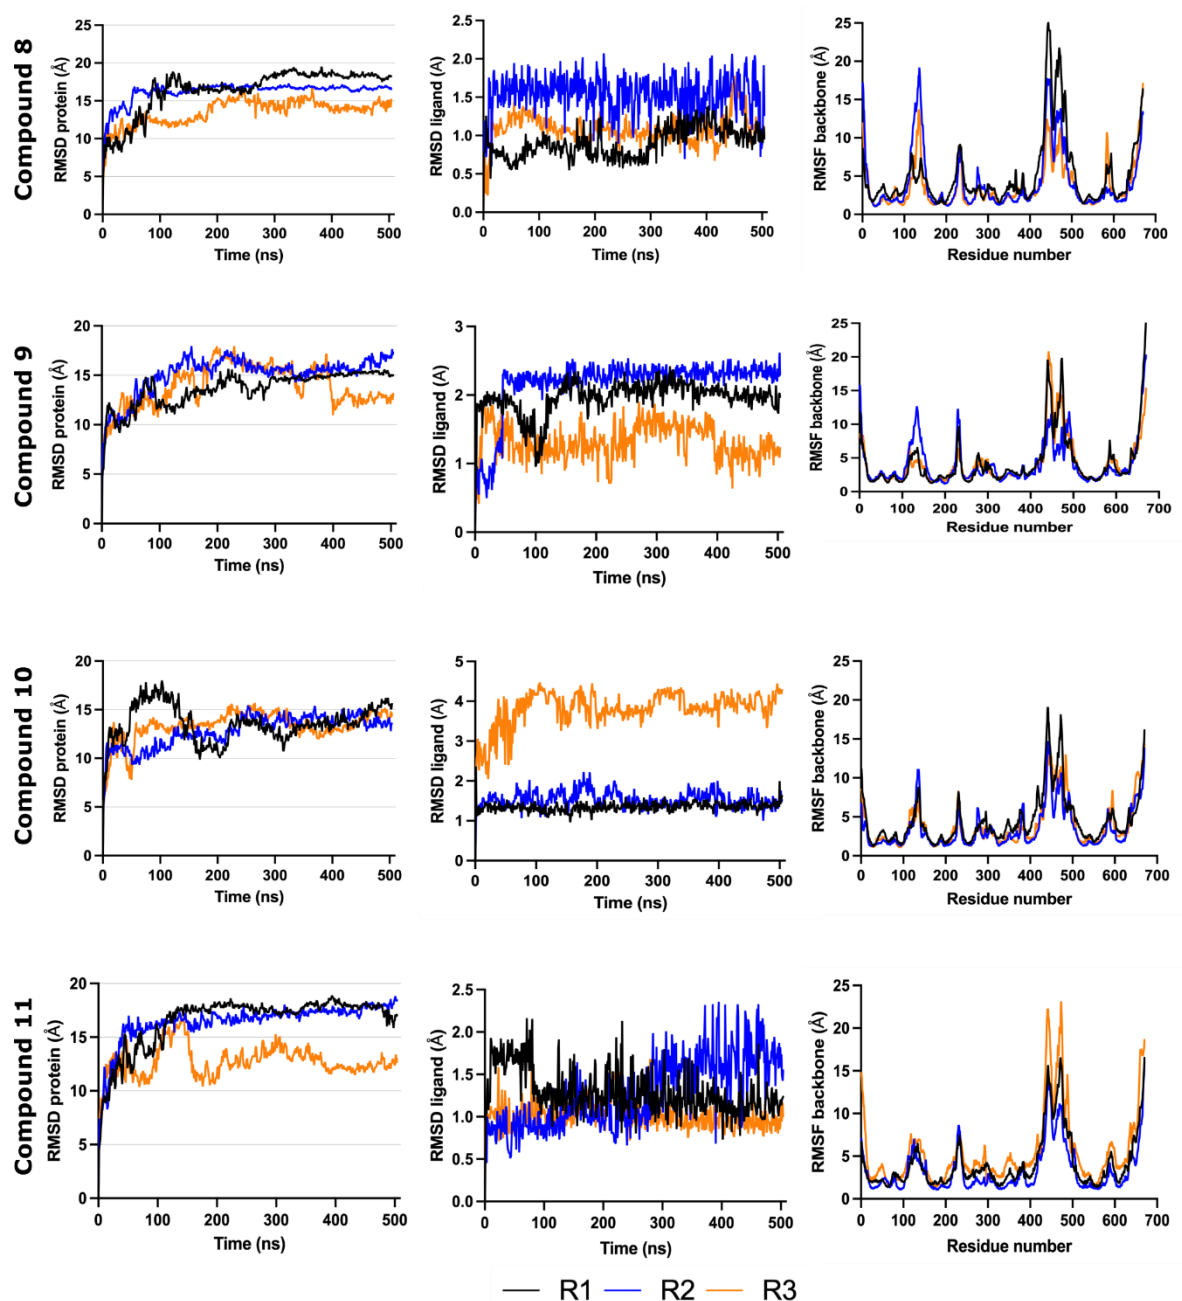

**Figure S8. Root Mean Squared Deviation (RMSD) of protein** along the analyzed simulation calculated in reference to the initial back bone conformation, **RMSD of ligand** along the analyzed simulation calculated in reference to the initial conformation heavy atoms and **RMSF (Root Mean squared fluctuations) of protein** along the analyzed simulations in reference to the initial conformation of protein backbone for **compounds 8-11**. Each replica is represented in different color.

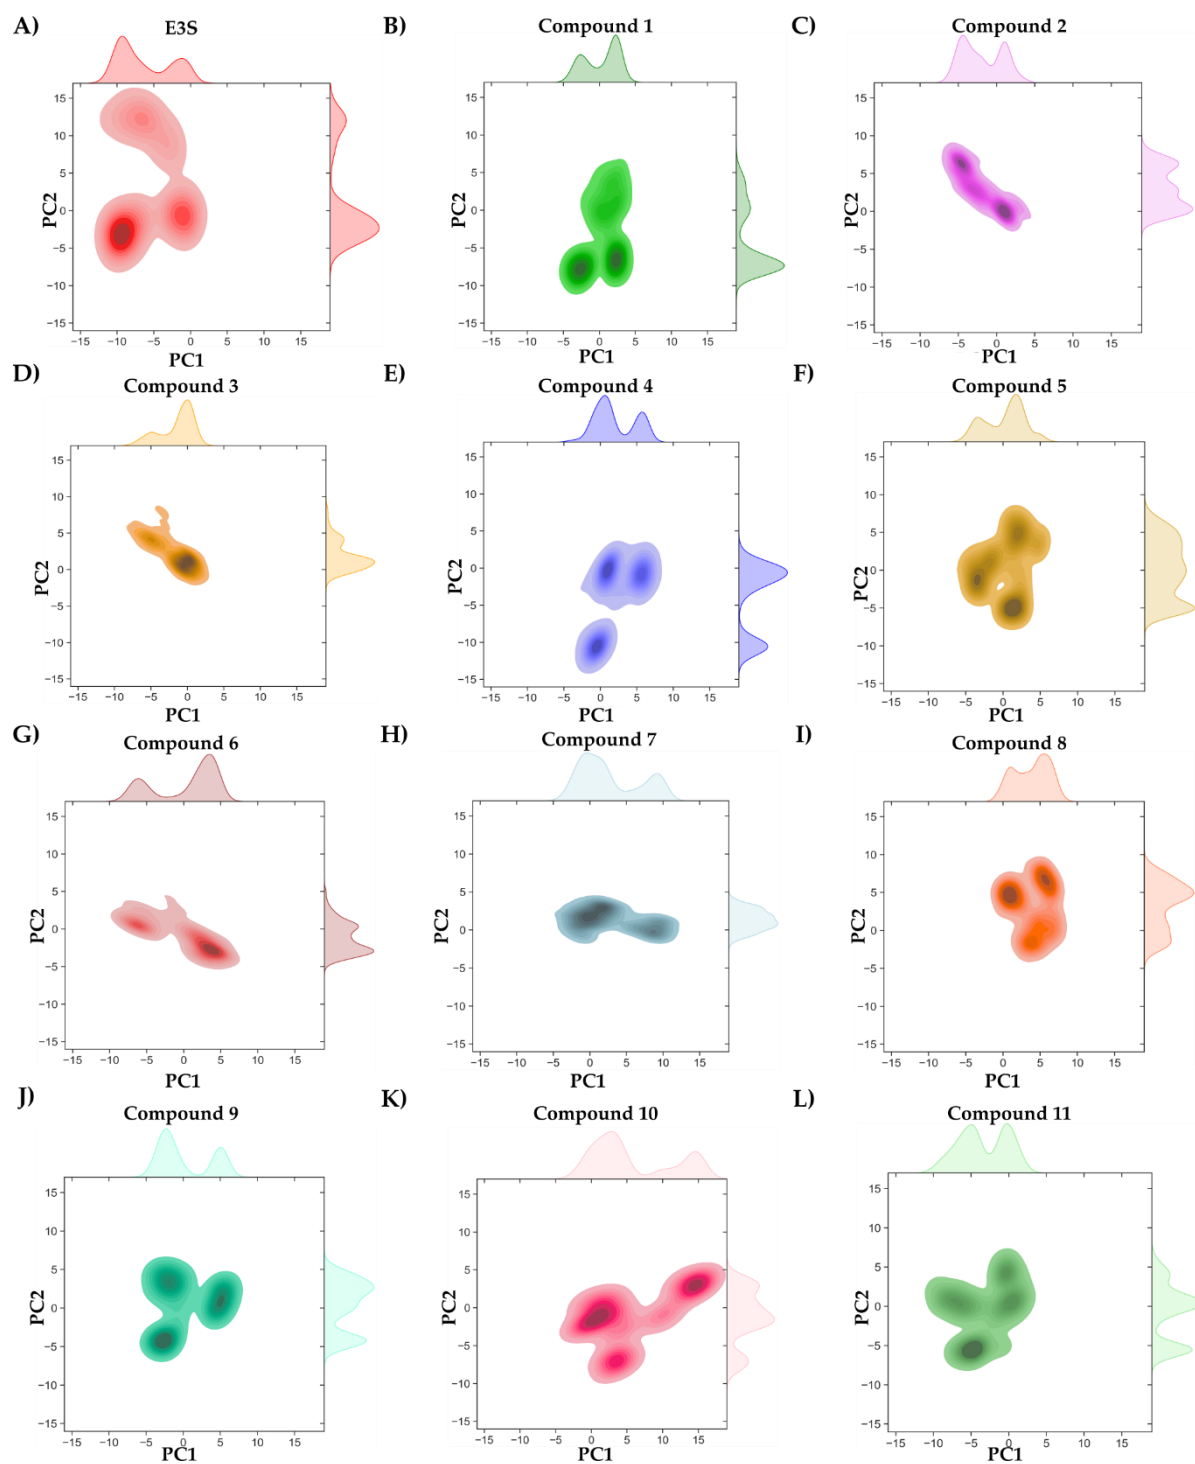

**Figure S9. Principal Component Analysis (PCA) of OATP1A2-ligand bound complexes:** Principal components plotted PC1 (21.83%) on x-axis vs PC2 (17.81%) on y-axis. A-L). Principal components plotted for all the compounds individually.
