# Supplementary material for: Neurosteroids: Structure-Uptake Relationships and Computational Modeling of Organic Anion Transporting Polypeptides (OATP)1A2
Source: Molecules. 2021 Sep 17;26(18):5662. doi: 10.3390/molecules26185662 (PMC8472597; doi:10.3390/molecules26185662)
Supplement: Supplementary file 1 [file molecules-26-05662-s001.zip › Figure_S1.pdf]

1 10 20 30 40 50 60 70 80 90  
OATP1A2 MGETEKRIRHTRIRCLSKLKFLLAHTCAFYVSKTILSGSYNMLTQIERQFNITKSLVGFINGSF EIGNLLLIHFSVYGTKLHRPIMITIGTCVFW  
6E9N .i00 . . . . .i10 . . . . .i20 . . . . .i30 . . . . .i40 . . . . .i50 . . . . .i60 . . . . .i70 . . . . .i80 . . . . .i90  
OATP1A2 GLGCFLKSLPHFLMNQYIEYSTVSVSGNLSSNFCLEMNGTQILRPQDPSECTKEVKSMLWVYVVLGNIVRMGETPIPLPLGISYIEDFAKFENS  
6E9N SVATIFLQGFAT . . . . .i210 . . . . .i220 . . . . .i230 . . . . .i240 . . . . .i250 . . . . .i260 . . . . .i270 . . . . .i280  
OATP1A2 PLYICLVETCAITVGLPLIGLILASFCANVYVDTFGVNTDDLITPTDTRWVGAWFGLICACVNLVITAFEFLLNPTLPKEGLTNAEDIKKNED  
6E9N ASAVCFYTSQQFVGLAFLTLPLIIWQEML . . . . .i320 . . . . .i330 . . . . .i340 . . . . .i350 . . . . .i360 . . . . .i370 . . . . .i380  
OATP1A2 KQKEEVKKKKYGITKDFLFPKMSLSCNPIYMLFIVSVIQCNFAVNMISFMKYLEQYQYGISSSDAIFLMGIYNLPPICTICITGLINKMKFKITV  
6E9N GLVLDGA . . . . .i400 . . . . .i410 . . . . .i420 . . . . .i430 . . . . .i440 . . . . .i450 . . . . .i460 . . . . .i470 . . . . .i480  
OATP1A2 KQAARICGCWLSLLEYLILYFLSFLMTCESSSVVGINTSYEGIPQDLYENIDIFADCNVDCNCPSKIWDVPCGNGLSYLSACLACGELTSIGTGINMV  
6E9N FSLGFAKRTPIICGLHISTICMGANYND . . . . .i510 . . . . .i520 . . . . .i530 . . . . .i540 . . . . .i550 . . . . .i560 . . . . .i570  
OATP1A2 FQNCSCIQTSGNSSAVLGLCDKGPDCSLMLQYFLLLSAMSSFIYSLAIPGYMVLRLCKMKEEKSIGVGLHTECTRVFAGIPADITYFCAAMDSTCL  
6E9N .s80 . . . . .i590 . . . . .i600 . . . . .i610 . . . . .i620 . . . . .i630 . . . . .i640 . . . . .i650 . . . . .i660 . . . . .i670  
OATP1A2 HWGTLKCGESGACRIYDSTTFRYIYGLPLAATAGRSFVPALILILIRKCKLHPGENASSGTELIETKVKGKENECKDIYQKSTVLKDDDELKTKL  
6E9N AP . . . . .i680 . . . . .i690 . . . . .i700 . . . . .i710 . . . . .i720 . . . . .i730 . . . . .i740 . . . . .i750
