# Supplementary material for: Neurosteroids: Structure-Uptake Relationships and Computational Modeling of Organic Anion Transporting Polypeptides (OATP)1A2
Source: Molecules. 2021 Sep 17;26(18):5662. doi: 10.3390/molecules26185662 (PMC8472597; doi:10.3390/molecules26185662)
Supplement: Supplementary file 1 [file molecules-26-05662-s001.zip › Figure_S2.pdf]

1

10

20

30

40

50

OATP1A2

1TGS

ENDIFADCNVD.CNCPSKIWDPVCGNNGLSYLSACLAAGCETSIGT..GINMVFQ.NCSC

SPQREATCTSEVSGCF.KIYNPVCCTDGITYSNECVL.CSENKKRQT PVL IQKSG..PC
