# Supplementary material for: Neurosteroids: Structure-Uptake Relationships and Computational Modeling of Organic Anion Transporting Polypeptides (OATP)1A2
Source: Molecules. 2021 Sep 17;26(18):5662. doi: 10.3390/molecules26185662 (PMC8472597; doi:10.3390/molecules26185662)
Supplement: Supplementary file 1 [file molecules-26-05662-s001.zip › Figure_S3.pdf]

A)

|         |             |            |            |             |             |
|---------|-------------|------------|------------|-------------|-------------|
| OATP1A2 | -----ET--   | ---HRIR--C | ----LSKLKM | FLLAITCAFV  | SKTL-SGSYM  |
| OATP1B1 | -----EN--   | ---KKTR--Y | ----CNGLKM | FLAALSLSFI  | AKTL-GAIIM  |
| OATP1B3 | -----EK--   | ---KKTR--R | ----CNGFKM | FLAALSFSYI  | AKAL-GGIIM  |
| OATP1C1 | -----SE--   | ---EKQP--C | ----CGELKV | FLCALS FVYF | AKAL-AEGYL  |
| OATP3A1 | -----KK--   | ---KKKKVSC | ----FSNIKI | FLVSECALML  | AQGT-VGAYL  |
| OATP2A1 | -----SRAG   | ---RCAR-SV | ----FGNIKV | FVLCQGLLQL  | CQLL-YSAYF  |
| OATP2B1 | -----GKAS   | PDPQDVRPSV | ----FHNIKL | FVLCHSLLQL  | AQLM-ISGYL  |
| OATP4A1 | -VSAGQSVAC  | GWWAFAP-PC | LQ-VLNTPKG | ILFFLCAAAF  | LQGMTVNGFI  |
| OATP5A1 | DL SKTFSVSS | ALAMLQERRC | LYVVLTDSRC | FLVCMCFLTF  | IQALMVSGYL  |
| OATP4C1 | E-----EGSY  | GWRNFHP-QC | LQ-RCNTPGG | FLLHYCLLAV  | TQGI VVNGLV |
| OATP6A1 | EVDDSL EQPC | GLGCLVS-TC | CE-CCNNIRC | FMIFYCILLI  | CQGVVF-GLI  |

B)

556

|         |             |              |             |             |             |
|---------|-------------|--------------|-------------|-------------|-------------|
| OATP1A2 | FIYSLAAIPG  | YMVLLRCMK    | EEKSLGVGLH  | TFCTRVFAGI  | PAPIYFGALM  |
| OATP1B1 | FFSALGGTSH  | VMLIVKIVQP   | ELKS LALGFH | SMVIRALGGI  | LAPIYFGALI  |
| OATP1B3 | LFSATGGTTF  | ILLTVKIVQP   | ELKALAMGFQ  | SMVIRTLGGI  | LAPIYFGALI  |
| OATP1C1 | YTL SLGGIPG | YILLRCIKP    | QLKS FALGIY | TLAIRVLAGI  | PAPVYFGVLI  |
| OATP3A1 | LIGAMAQTPS  | VII LIRT VSP | ELKS YALGVL | FLLLRL LGFI | PPPLIFGAGI  |
| OATP2A1 | LIACISHNPL  | YMMVLRVVNQ   | EEKSFAIGVQ  | FLLMRL LAWL | PSPALYGLTI  |
| OATP2B1 | ALACLTHTPS  | FMLILRGVKK   | EDKT LAVGIQ | FMFLRILAWM  | PSPVIHGS AI |
| OATP4A1 | FFTFLSSIPA  | LTATLRCVRD   | PQRS FALGIQ | WIVVRILGGI  | PGPIAFGWVI  |
| OATP5A1 | FITACAQPSA  | IIVTLRSVED   | EERPFALGMQ  | FVLLRTLAYI  | PTPIYFGAVI  |
| OATP4C1 | IFTFMAGTPI  | TVSILRCVNH   | RQRSLALGIQ  | FMVLRL LGTI | PGPIIFGFTI  |
| OATP6A1 | IFSGFSGVPI  | VLAMTRVVPD   | KLRSLALGVS  | YVILRIFGTI  | PGPSIFKMSG  |

C)

168

172

|         |             |            |            |             |             |
|---------|-------------|------------|------------|-------------|-------------|
| OATP1A2 | -ENG TQILRP | TQD--PSECT | KEVKSLMWVY | VLVG-NIVRG  | MGETPI LPLG |
| OATP1B1 | NQI-LSLNRA  | SPEIVGKGCL | KESGSYMWIY | VFMG-NMLRG  | IGETPI VPLG |
| OATP1B3 | NQT-LSFN GT | SPEIVEKDCV | KESGSHMWIY | VFMG-NMLRG  | IGETPI VPLG |
| OATP1C1 | SQLPVS VMEK | SKSKISNECE | VDTSSSMWIY | VFLG-NLLRG  | IGETPI QPLG |
| OATP3A1 | NGSGGD-EGP  | DPDLI---CR | NRTATNMMYL | LLIGAQVLLG  | IGATPVQPLG  |
| OATP2A1 | -KHWQDLPPS  | KCHSTTQNPQ | KETS--SMWG | LMVVAQLLAG  | IGTVPI QPFG |
| OATP2B1 | -P-TTSAPAS  | APSNGNCSSY | TETQHLSVVG | IMFVAQTLLG  | VGGVPI QPFG |
| OATP4A1 | -----PA     | NPGAVCADST | SGLSR--YQL | VFMLGQFLHG  | VGATPLYTLG  |
| OATP5A1 | -----TL     | EPPA-CPKDS | GGNNHWVYVA | LFICAQILIG  | MGSTPI YTLG |
| OATP4C1 | -----TT     | RNSTSCTSST | SSL-S-NYLY | VFILGQ LLLG | AGGTPLYTLG  |
| OATP6A1 | -----EI     | KVVSGCQSSG | ISFQS-KYLS | FFILGQTVQG  | IAGMPLYILG  |
